# Supplementary material for: Ruthenium(II)-enabled para-selective C–H difluoromethylation of anilides and their derivatives
Source: PubMed Central journal article supplement (PMC5864885; doi:10.1038/s41467-018-03341-6), 2018-03-22
Supplement: 41467_2018_3341_MOESM2_ESM.pdf [file 41467_2018_3341_MOESM2_ESM.pdf]

## Description of Additional Supplementary Files

File Name: Supplementary Data 1

Description: Cif file of 5c

File name: Supplementary Data 2

Description: Checkcif of 5c
